# Supplementary material for: Similar object shape representation encoded in the inferolateral occipitotemporal cortex of sighted and early blind people
Source: PubMed Central journal article supplement (PMC10368275; doi:10.1371/journal.pbio.3001930), 2023-07-25
Supplement: pbio.3001930.s005.pdf [file pbio.3001930.s005.pdf]

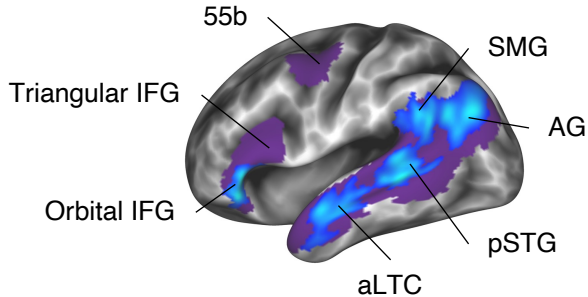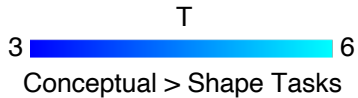

Language Network
