# Supplementary material for: Similar object shape representation encoded in the inferolateral occipitotemporal cortex of sighted and early blind people
Source: PubMed Central journal article supplement (PMC10368275; doi:10.1371/journal.pbio.3001930), 2023-07-25

**A** Shape Similarity: All (N = 48)

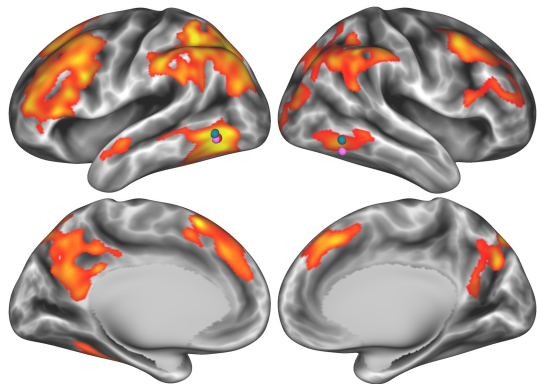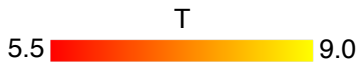

**B** Shape Similarity: EB > SC

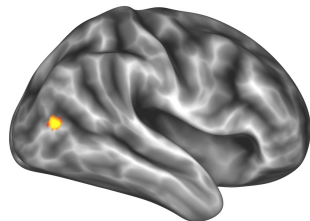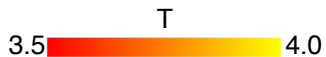

Supplement: pbio.3001930.s008.pdf [file pbio.3001930.s008.pdf]
