# Supplementary material for: Similar object shape representation encoded in the inferolateral occipitotemporal cortex of sighted and early blind people
Source: PubMed Central journal article supplement (PMC10368275; doi:10.1371/journal.pbio.3001930), 2023-07-25
Supplement: pbio.3001930.s011.pdf [file pbio.3001930.s011.pdf]

**S1 Table. Demographic information of the early blind and their matched sighted control**

| Early Blind | Gender | Age | Handedness <sup>a</sup> | Onset of Blindness | Etiology                   | Sighted Control | Gender | Age | Handedness <sup>a</sup> |
|-------------|--------|-----|-------------------------|--------------------|----------------------------|-----------------|--------|-----|-------------------------|
| EB01        | F      | 33  | 90                      | Birth              | Retinopathy of Prematurity | SC01            | F      | 32  | 80                      |
| EB02        | M      | 32  | 60                      | Birth              | Retinitis Pigmentosa       | SC02            | M      | 29  | 50                      |
| EB03        | M      | 47  | 70                      | Birth              | Optic Nerve Hypoplasia     | SC03            | M      | 50  | 90                      |
| EB04        | F      | 31  | 70                      | 8 Months           | Retinitis Pigmentosa       | SC04            | F      | 31  | 40                      |
| EB05        | F      | 29  | 80                      | Birth              | Microphthalmia             | SC05            | F      | 26  | 50                      |
| EB06        | M      | 28  | 90                      | Birth              | Congenital Toxoplasmosis   | SC06            | M      | 29  | 100                     |
| EB07        | F      | 30  | 60                      | Birth              | Agenesis                   | SC07            | F      | 27  | 60                      |
| EB08        | M      | 32  | 80                      | Birth              | Leber Congenital Amaurosis | SC08            | M      | 34  | 70                      |
| EB09        | M      | 34  | 80                      | Birth              | Anophthalmia               | SC09            | M      | 31  | 100                     |
| EB10        | F      | 38  | 40                      | Birth              | Retinopathy of Prematurity | SC10            | F      | 41  | 60                      |
| EB11        | F      | 28  | 70                      | Birth              | Retinopathy of Prematurity | SC11            | F      | 26  | 90                      |
| EB12        | M      | 30  | 70                      | Birth              | Leber Congenital Amaurosis | SC12            | M      | 32  | 80                      |
| EB13        | F      | 34  | 100                     | Birth              | Retinopathy of Prematurity | SC13            | F      | 31  | 90                      |
| EB14        | F      | 32  | 100                     | 2 Years            | Retinoblastoma             | SC14            | F      | 31  | 70                      |
| EB15        | F      | 35  | 60                      | 4 Years            | Retinitis Pigmentosa       | SC15            | F      | 37  | 100                     |
| EB16        | F      | 32  | 60                      | Birth              | Retinitis Pigmentosa       | SC16            | F      | 33  | 100                     |

<sup>a</sup> Handedness was assessed with a modified version of the Edinburgh handedness questionnaire, which is also suitable for the blind population.
