# Supplementary material for: Similar object shape representation encoded in the inferolateral occipitotemporal cortex of sighted and early blind people
Source: PubMed Central journal article supplement (PMC10368275; doi:10.1371/journal.pbio.3001930), 2023-07-25
Supplement: pbio.3001930.s012.pdf [file pbio.3001930.s012.pdf]

**S2 Table. Stimuli**

| Words         | English Translation |
|---------------|---------------------|
| anello        | ring                |
| braccialeto   | bracelet            |
| candela       | candle              |
| ciotola       | bowl                |
| coperta       | blanket             |
| cucchiaino    | spoon               |
| cuscino       | pillow              |
| diario        | notebook            |
| fiammifero    | matchstick          |
| forchetta     | fork                |
| gessetto      | chalk               |
| lavagna       | blackboard          |
| moneta        | coin                |
| penna         | pen                 |
| piatto        | plate               |
| portafoglio   | wallet              |
| portapenne    | penholder           |
| salvagente    | lifebuoy            |
| stuzzicadenti | toothpick           |
| timone        | rudder              |
| tovagliolo    | napkin              |
