# Supplementary material for: Similar object shape representation encoded in the inferolateral occipitotemporal cortex of sighted and early blind people
Source: PubMed Central journal article supplement (PMC10368275; doi:10.1371/journal.pbio.3001930), 2023-07-25
Supplement: pbio.3001930.s014.pdf [file pbio.3001930.s014.pdf]

**S4 Table. Neural representation in bilateral aIPS**

| <b>Three-way Mixed ANOVA *</b>                   | <b>Left aIPS</b>         |                     | <b>Right aIPS</b>        |                     |
|--------------------------------------------------|--------------------------|---------------------|--------------------------|---------------------|
| <b>Groups</b><br>(EB vs. SC)                     | F(1, 30) = 2.471         | p = 0.126           | F(1, 30) = 2.004         | p = 0.167           |
| <b>Tasks</b><br>(Shape vs. Conceptual)           | F(1, 30) = 1.552         | p = 0.223           | F(1, 30) = 0.442         | p = 0.551           |
| <b>Representations</b><br>(Shape vs. Conceptual) | <b>F(1, 30) = 26.995</b> | <b>p &lt; 0.001</b> | <b>F(1, 30) = 5.524</b>  | <b>p = 0.026</b>    |
| <b>Groups × Tasks</b>                            | F(1, 30) = 2.996         | p = 0.094           | F(1, 30) = 0.819         | p = 0.373           |
| <b>Groups × Representations</b>                  | F(1, 30) = 0.021         | p = 0.885           | F(1, 30) = 0.117         | p = 0.735           |
| <b>Tasks × Representations</b>                   | <b>F(1, 30) = 18.300</b> | <b>p &lt; 0.001</b> | <b>F(1, 30) = 16.807</b> | <b>p &lt; 0.001</b> |
| <b>Groups × Tasks × Representations</b>          | F(1, 30) = 1.495         | p = 0.231           | F(1, 30) = 0.367         | p = 0.549           |

\* The Groups factor was between-subject, whereas Tasks and Representations were within-subject factors.
