# Supplementary material for: Similar object shape representation encoded in the inferolateral occipitotemporal cortex of sighted and early blind people
Source: PubMed Central journal article supplement (PMC10368275; doi:10.1371/journal.pbio.3001930), 2023-07-25
Supplement: pbio.3001930.s015.pdf [file pbio.3001930.s015.pdf]

**S5 Table. Neural representation in bilateral pIPS**

| <b>Three-way Mixed ANOVA *</b>                   | <b>Left pIPS</b>         |                     | <b>Right pIPS</b>        |                     |
|--------------------------------------------------|--------------------------|---------------------|--------------------------|---------------------|
| <b>Groups</b><br>(EB vs. SC)                     | F(1, 30) = 2.925e-5      | p = 0.996           | F(1, 30) = 0.350         | p = 0.559           |
| <b>Tasks</b><br>(Shape vs. Conceptual)           | F(1, 30) = 0.840         | p = 0.367           | F(1, 30) = 0.517         | p = 0.478           |
| <b>Representations</b><br>(Shape vs. Conceptual) | <b>F(1, 30) = 11.158</b> | <b>p = 0.002</b>    | <b>F(1, 30) = 12.745</b> | <b>p = 0.001</b>    |
| <b>Groups × Tasks</b>                            | F(1, 30) = 2.203         | p = 0.148           | F(1, 30) = 0.676         | p = 0.417           |
| <b>Groups × Representations</b>                  | F(1, 30) = 1.104         | p = 0.302           | F(1, 30) = 2.087         | p = 0.159           |
| <b>Tasks × Representations</b>                   | <b>F(1, 30) = 26.524</b> | <b>p &lt; 0.001</b> | <b>F(1, 30) = 15.401</b> | <b>p &lt; 0.001</b> |
| <b>Groups × Tasks × Representations</b>          | F(1, 30) = 1.819         | p = 0.188           | <b>F(1, 30) = 4.597</b>  | <b>p = 0.040</b>    |

\* The Groups factor was between-subject, whereas Tasks and Representations were within-subject factors.
