# Supplementary material for: Similar object shape representation encoded in the inferolateral occipitotemporal cortex of sighted and early blind people
Source: PubMed Central journal article supplement (PMC10368275; doi:10.1371/journal.pbio.3001930), 2023-07-25
Supplement: pbio.3001930.s016.pdf [file pbio.3001930.s016.pdf]

**S6 Table. Neural representation in bilateral vPMC**

| <b>Three-way Mixed ANOVA *</b>                   | <b>Left vPMC</b>         |                  | <b>Right vPMC</b>        |                     |
|--------------------------------------------------|--------------------------|------------------|--------------------------|---------------------|
| <b>Groups</b><br>(EB vs. SC)                     | F(1, 30) = 0.548         | p = 0.465        | F(1, 30) = 0.033         | p = 0.858           |
| <b>Tasks</b><br>(Shape vs. Conceptual)           | F(1, 30) = 0.476         | p = 0.496        | F(1, 30) = 0.882         | p = 0.355           |
| <b>Representations</b><br>(Shape vs. Conceptual) | <b>F(1, 30) = 7.494</b>  | <b>p = 0.010</b> | <b>F(1, 30) = 8.336</b>  | <b>p = 0.007</b>    |
| <b>Groups × Tasks</b>                            | F(1, 30) = 1.086         | p = 0.306        | F(1, 30) = 3.026         | p = 0.092           |
| <b>Groups × Representations</b>                  | F(1, 30) = 0.197         | p = 0.660        | F(1, 30) = 0.171         | p = 0.682           |
| <b>Tasks × Representations</b>                   | <b>F(1, 30) = 11.741</b> | <b>p = 0.002</b> | <b>F(1, 30) = 16.044</b> | <b>p &lt; 0.001</b> |
| <b>Groups × Tasks × Representations</b>          | F(1, 30) = 2.071         | p = 0.160        | F(1, 30) = 4.102         | p = 0.052           |

\* The Groups factor was between-subject, whereas Tasks and Representations were within-subject factors.
