# Supplementary material for: Similar object shape representation encoded in the inferolateral occipitotemporal cortex of sighted and early blind people
Source: PubMed Central journal article supplement (PMC10368275; doi:10.1371/journal.pbio.3001930), 2023-07-25
Supplement: pbio.3001930.s017.pdf [file pbio.3001930.s017.pdf]

## **S1 Text. English translation of survey questions**

### *Shape Familiarity*

To what degree do you know the object's typical shape? (7-point Likert scale rating)

1: do not know it at all                      7: know it very well

### *Conceptual Familiarity*

To which degree do you know what this object is used for? (7-point Likert scale rating)

1: do not know it at all                      7: know it very well

### *Touch Experience*

How frequently have you touched this object? (7-point Likert scale rating)

1: have never touched it before                      7: touch it every day

### *Size*

How big is this object? (7-point Likert scale rating)

1: as small as a needle                      7: as big as a television

### *Contextual Association*

To which extent is this object associated with a specific context? (7-point Likert scale rating)

For example, a "cellphone" can occur in many different contexts and is unassociated with any particular context. You might rate 1 or 2. Instead, a "bowling ball" can only occur on the bowling alley; it is strongly associated with one specific context. You might rate 7.

### *Toolness*

To which extent is this object a tool? (7-point Likert scale rating)

A tool is defined as a graspable and manipulable object that can transform the motor output into predictable mechanical actions for the purposes of attaining specific goals. You might rate 1 for "lamp," "chair," and "clock"; 7 for "hammer," "saw," and "drill."

### *Pairwise Shape Similarity*

To which extent is this pair of objects similar in shape? (7-point Likert scale rating)

For example, "racket" and "pan" are similar in shape; you might rate 6 or 7; "racket" and "tennis ball" are not similar in shape, you might rate 1 or 2. Due to the recent expansion of business innovation, some objects may exist in a variety of shapes, e.g., watermelon may be in a square shape. Please rate the shape based on its most typical shape (i.e., spherical watermelon). Please disregard the other object properties, e.g., color, size, texture, and function.

### *Pairwise Conceptual Association*

To which extent is this pair of objects conceptually associated? (7-point Likert scale rating)

For example, "racket" and "tennis ball" are conceptually associated; you might rate 7; "racket" and "pan" are not conceptually associated, you might rate 1. Please disregard the other object properties, e.g., color, size, texture, and shape.
